# Supplementary material
Source: Springer Nature journal article supplement (https://www.springermedizin.de/resource/supplementary/12955_2011_907_MOESM1_ESM.PDF/9558550)
Supplement: MOESM1 [file 9558550]

**Comparison of the study sample with the sample excluded from analysis, No. (%) or Mean (SD)**

|                                                   | Adolescents<br>included in<br>study sample<br>N=584 | Adolescents<br>excluded<br>from<br>analysis<br>N=455 | <i>p</i> <sup>*</sup> |
|---------------------------------------------------|-----------------------------------------------------|------------------------------------------------------|-----------------------|
| <i>Socio-demographic characteristics</i>          |                                                     |                                                      |                       |
| <b>Gender</b>                                     |                                                     |                                                      |                       |
| Female                                            | 322 (55.1)                                          | 263 (57.8)                                           | ns                    |
| Male                                              | 262 (44.9)                                          | 192 (42.2)                                           |                       |
| <b>Age</b>                                        |                                                     |                                                      |                       |
| 12 – 15                                           | 371 (63.5)                                          | 268 (58.9)                                           | ns                    |
| 16 – 19                                           | 213 (36.5)                                          | 187 (41.1)                                           |                       |
| <i>Mean (SD)</i>                                  | 14.9 ( 1.9)                                         | 15.1 ( 2.0)                                          |                       |
| <b>Educational level</b> <sup>a,b</sup>           |                                                     |                                                      |                       |
| Lower                                             | 326 (56.2)                                          | 202 (55.2)                                           | ns                    |
| Higher                                            | 254 (43.8)                                          | 164 (44.8)                                           |                       |
| <b>Ethnicity</b>                                  |                                                     |                                                      |                       |
| Dutch surname                                     | 526 (90.7)                                          | 351 (77.1)                                           | <.001                 |
| Non-Dutch surname                                 | 54 ( 9.3)                                           | 104 (22.9)                                           |                       |
| <i>Disease-related characteristics</i>            |                                                     |                                                      |                       |
| <b>Age at diagnosis</b> <sup>c</sup>              |                                                     |                                                      |                       |
| 0-5 yrs                                           | 428 (73.3)                                          | 282 (62.8)                                           | <.001                 |
| ≥6 yrs                                            | 156 (26.7)                                          | 167 (37.2)                                           |                       |
| <b>Number of visits of outpatient department</b>  |                                                     |                                                      |                       |
| <i>Range</i>                                      | 1-111                                               | 1-146                                                | ns                    |
| <i>Mean (SD)</i>                                  | 16.9 (15.4)                                         | 17.6 (17.9)                                          |                       |
| <b>Number of hospital admissions</b>              |                                                     |                                                      |                       |
| <i>Range</i>                                      | 0-138                                               | 0-139                                                | ns                    |
| <i>Mean (SD)</i>                                  | 4.9 ( 9.8)                                          | 4.4 (10.1)                                           |                       |
| <b>Number of different outpatient departments</b> |                                                     |                                                      |                       |
| <i>Range</i>                                      | 1-15                                                | 1-15                                                 | ns                    |
| <i>Mean (SD)</i>                                  | 3.1 ( 2.2)                                          | 3.1 (2.3)                                            |                       |
| <i>Consequences of chronic condition</i>          |                                                     |                                                      |                       |
| <b>Presence therapeutic regimen</b> <sup>d</sup>  |                                                     |                                                      |                       |
| Yes                                               | 378 (64.7)                                          | 259 (60.0)                                           | ns                    |
| <b>Presence physical limitations</b> <sup>e</sup> |                                                     |                                                      |                       |
| Yes                                               | 165 (28.3)                                          | 129 (28.9)                                           | ns                    |
| <b>School/work absenteeism</b>                    |                                                     |                                                      |                       |
| <i>Range</i>                                      | 1-5                                                 | 1-5                                                  | ns                    |
| <i>Mean (SD)</i>                                  | 1.9 ( .90)                                          | 2.0 ( .93)                                           |                       |
| <b>Experienced burden</b>                         |                                                     |                                                      |                       |
| <i>Range</i>                                      | 2-10                                                | 2-10                                                 | ns                    |
| <i>mean (SD)</i>                                  | 4.6 ( 2.1)                                          | 4.8 ( 2.3)                                           |                       |

\* Independent samples Mann-Whitney U test to test if distributions or Paired-Sample t-test to test if the means differ significantly between study sample and excluded sample.

<sup>a</sup> N=580 for study sample.

<sup>b</sup> N=366 for excluded sample.

<sup>c</sup> N=449 for excluded sample.

<sup>d</sup> N=432 for excluded sample.

<sup>e</sup> N=447 for excluded sample.
